# Supplementary material for: Z-Scheme 2D/3D hierarchical MoS2@CoMoS4 flower-shaped arrays with enhanced full spectrum light photoelectrocatalytic activity for H2O2/p-aminophenol production and contaminant degradation
Source: Royal Society of Chemistry journal article supplement (doi:10.1039/d0ta07796h), 2020-01-01
Supplement: d0ta07796h1.pdf [file d0ta07796h1.pdf]

## Supporting Information

**Z-scheme 2D/3D hierarchical MoS<sub>2</sub>@CoMoS<sub>4</sub> flower-shaped arrays  
with enhanced full spectrum light photoelectrocatalytic activity for  
H<sub>2</sub>O<sub>2</sub>/*p*-aminophenol production and contaminants degradation**

Ao Zhang, Lijun Yang, Lei Zhang\*

*College of Chemistry, Liaoning University, 66 Chongshan Middle Road, Shenyang,*

*Liaoning, 110036, People's Republic of China*

---

\* Corresponding author. Tel.: +86 24 62207809; Fax: +86 24 62202380.  
E-mail address: [zhanglei63@126.com](mailto:zhanglei63@126.com) (L. Zhang).

**SEM of pure MoS<sub>2</sub> nanosheets:**

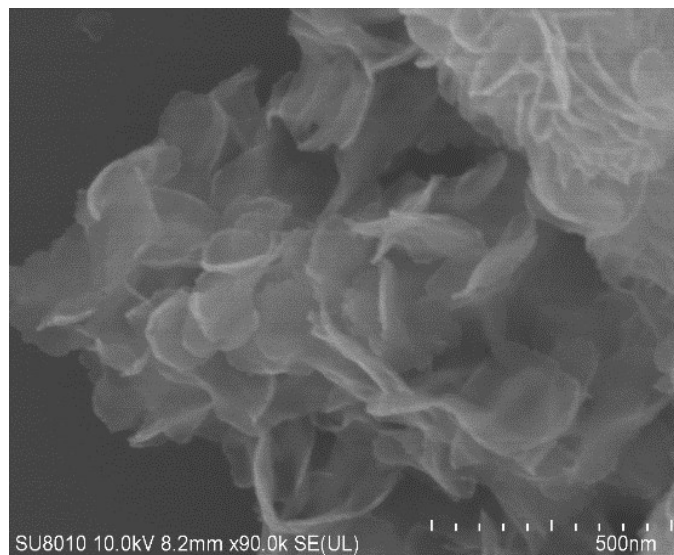

**Fig. S1.** SEM image of MoS<sub>2</sub> nanosheets.

### Bias potential optimization curve

Fig. S2 showed the effect of photo-cathodic bias potential ( $-0.4$  to  $-0.8$  V vs SCE) on  $\text{H}_2\text{O}_2$  production using the  $\text{MoS}_2@\text{CoMoS}_4$  photo-cathode. It can be seen that the  $\text{H}_2\text{O}_2$  yields increased when the cathodic bias potential decreased from  $-0.4$  V to  $-0.5$  V. When the cathodic bias potential exceeded  $-0.5$  V, the  $\text{H}_2\text{O}_2$  yield declined. The increase of cathodic bias potential can enhance the electron transfer photogenerated on the  $\text{MoS}_2@\text{CoMoS}_4$  photo-cathode, which can further promote the  $\text{H}_2\text{O}_2$  production. When the photo-cathodic bias potential became more negative than  $-0.5$  V, hydrogen evolution reaction could appear and become more remarkable on the photo-cathode, which inhibited the accumulation of  $\text{H}_2\text{O}_2$ . Therefore,  $-0.5$  V is the best bias potential in this experiment.

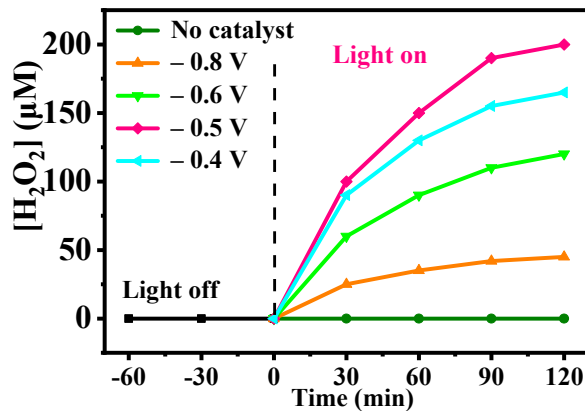

Fig. S2. The effects of applied potentials (vs. SCE) on the yields of  $\text{H}_2\text{O}_2$  over  $\text{MoS}_2@\text{CoMoS}_4$ .

### MoS<sub>2</sub> modifying dosages optimization curve

The addition amount of MoS<sub>2</sub> was 0.037 g, 0.075 g, 0.112 g, 0.149 g and 0.186g, respectively. When the addition amount of MoS<sub>2</sub> was 0.149 g, the catalytic production of H<sub>2</sub>O<sub>2</sub> reached the maximum, which was chose as the optimal MoS<sub>2</sub> addition amount.

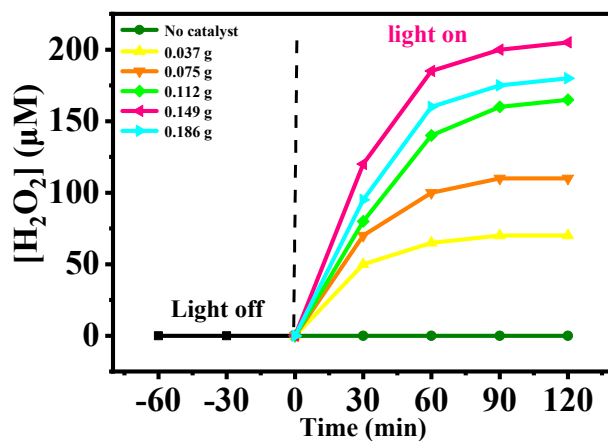

**Fig. S3.** The effect of MoS<sub>2</sub> modifying dosages on the yields of H<sub>2</sub>O<sub>2</sub> over MoS<sub>2</sub>@CoMoS<sub>4</sub>.

The HPLC chromatograms of pure *p*-NP and *p*-AP.

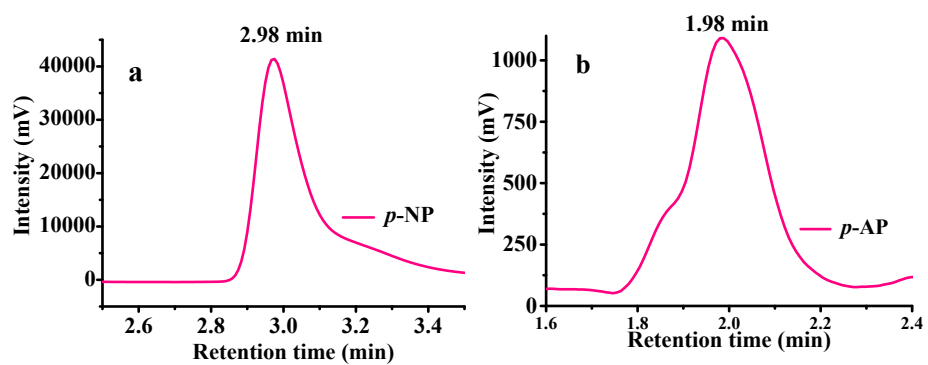

Fig. S4. HPLC chromatograms of *p*-NP standard (a) and *p*-AP standard (b) under the same conditions.
